# Supplementary material for: Characterization of Glycan Structures of Chondroitin Sulfate-Glycopeptides Facilitated by Sodium Ion-Pairing and Positive Mode LC-MS/MS
Source: PubMed Central journal article supplement (PMC5227003; doi:10.1007/s13361-016-1539-1), 2016-11-21
Supplement: 13361_2016_1539_MOESM1_ESM.pdf [file 13361_2016_1539_MOESM1_ESM.pdf]

## Supplementary figures

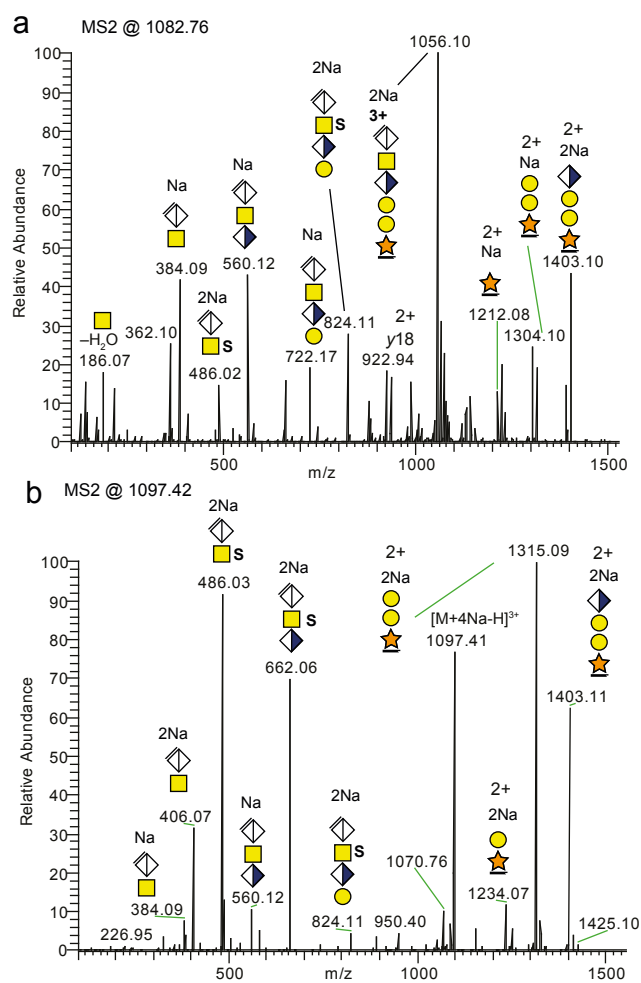

**Fig. S1. HCD-MS2 spectra of mono-sulfated bikunin CS-glycopeptides at 100 mM Na<sup>+</sup> ions.** (a) HCD-MS2 spectrum of the [M+2Na+H]<sup>3+</sup> precursor and (b) the [M+4Na-H]<sup>3+</sup> precursor. The MS1 survey scan is presented in Fig. 3 of the main text. A NCE of 20% was used. All major fragment ions are annotated with charges > 1, m/z values, n.o of Na<sup>+</sup>-adducts and glycan structures.

a

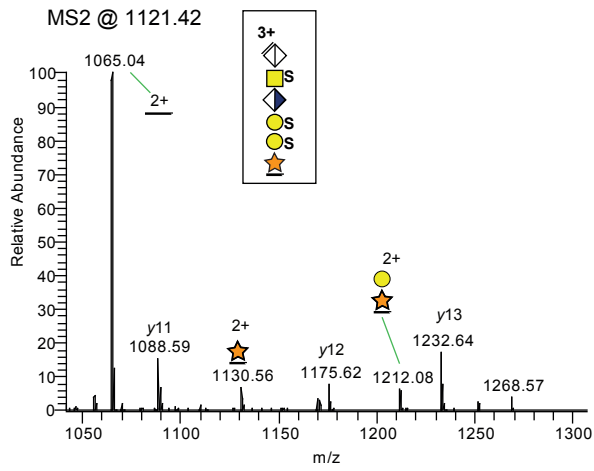

b

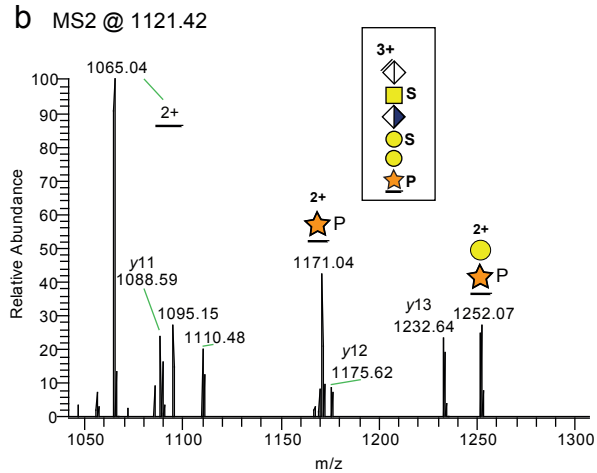

**Fig. S2. HCD-MS2 of protonated bikunin CS-glycopeptides. (a)** disulfated/phosphorylated (SSP-form) and **(b)** trisulfated (SSS-form). The precursor structures are shown in the boxes. A NCE of 30% was used. Peptide backbone fragmented y-ions, carrying an intact C-terminal, of the AVLPQEEEGSGGGQLVTEVTK sequence are annotated.

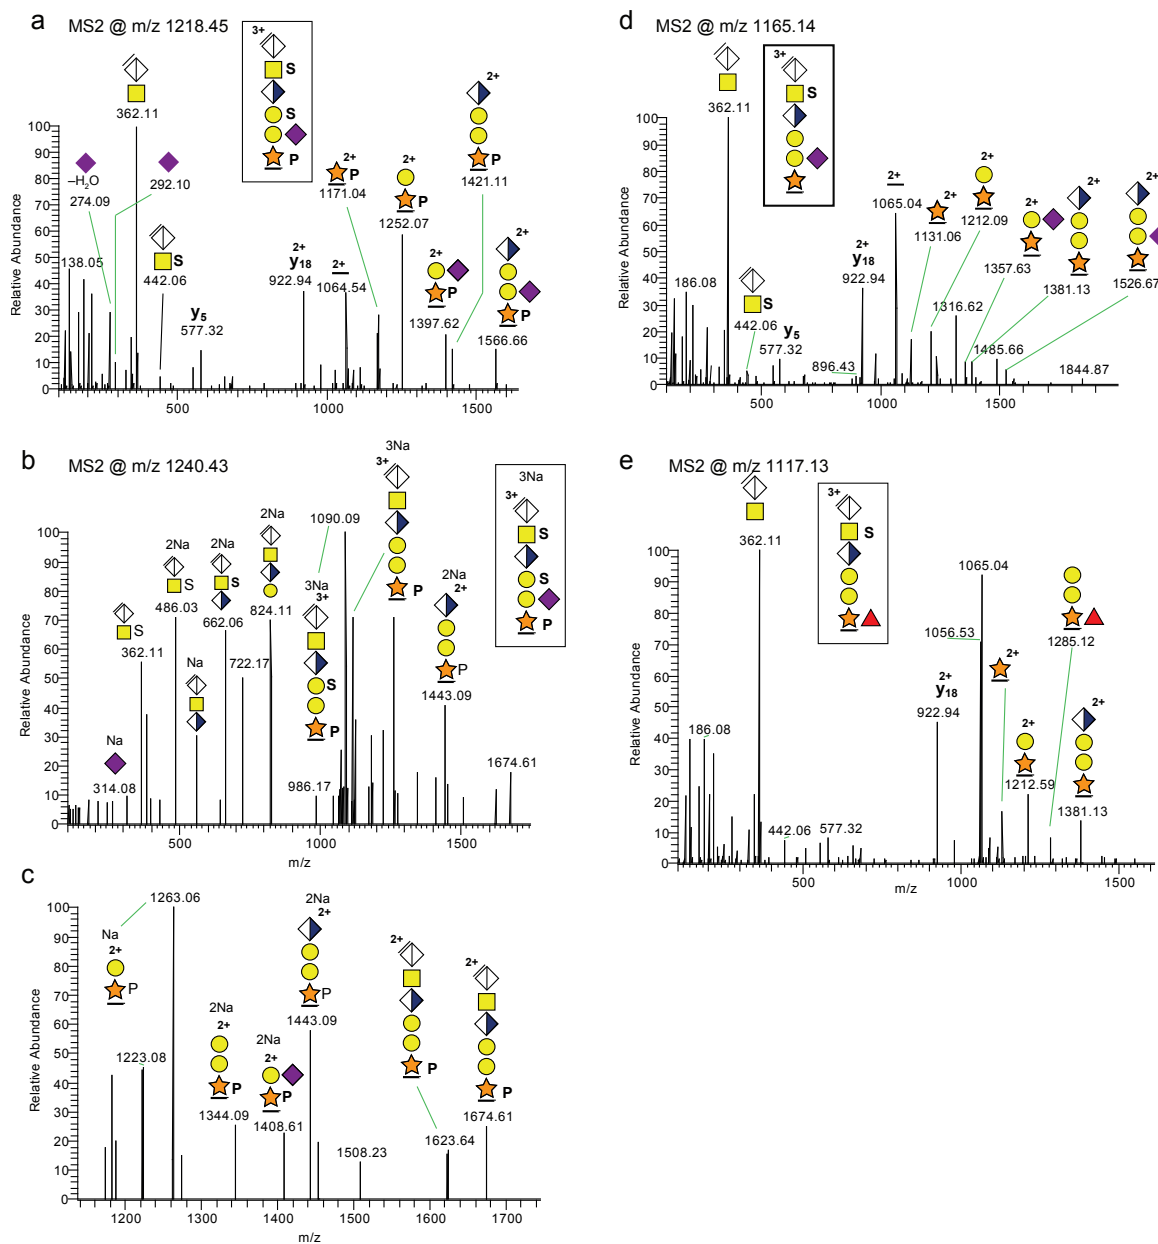

**Fig. S3. Additional glycoforms of bikunin CS-glycopeptides.** (a) HCD-MS2 spectra of a protonated precursor of the sialylated, phosphorylated and di-sulfated glycoform of the bikunin CS-glycopeptide. (b) The corresponding  $[M+3Na]^+$  precursor and (c) the  $m/z$  1100-1700 region. (d) A sialylated and mono-sulfated and (e) a fucosylated and mono-sulfated glycoform of the bikunin CS-glycopeptide. The precursor ion structures and charge states are indicated in the boxes. A NCE of 20% was used. The  $m/z$  values of precursor ions are that of the largest isotope peak. The monoisotopic masses of protonated precursor ions are presented in Table 1.
